# Supplementary material
Source: MDPI journal article supplement (https://www.mdpi.com/2673-8783/2/4/22)
Supplement: s1 [file s1 › biomass-1972210-supplementary.pdf]

Supplementary Materials:

# An Investigation into Apricot Pulp Waste as a Source of Antioxidant Polyphenols and Carotenoid Pigments

Ioannis Makrygiannis, Vassilis Athanasiadis, Eleni Bozinou, Theodoros Chatzimitakos, Dimitris P. Makris and Stavros I. Lalas \*

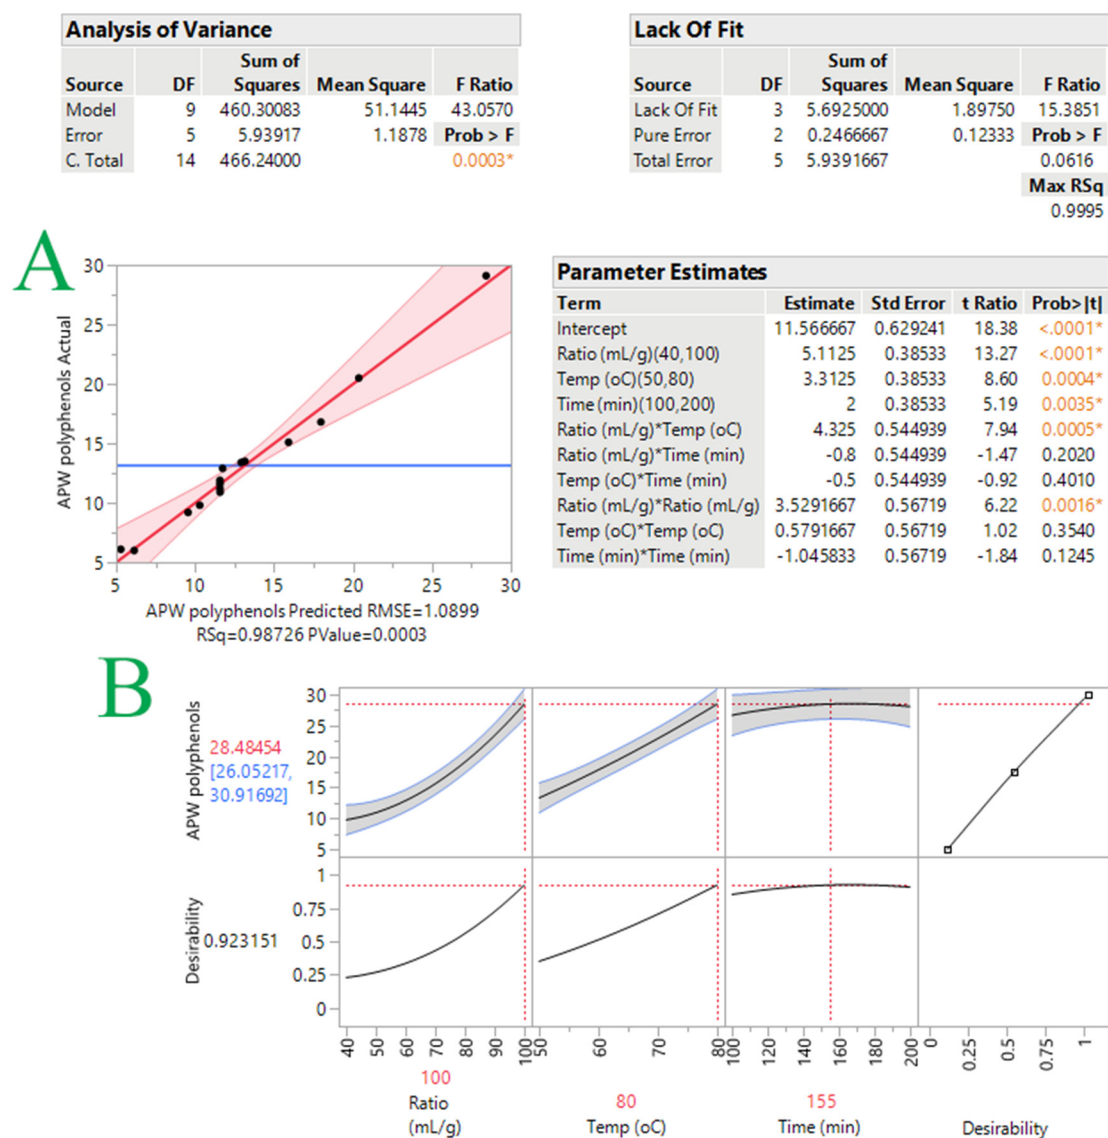

**Figure S1.** Plot comparing actual *vs* predicted values for the response (TPC, mg GAE/g dw) (plot A) and desirability function (plot B) for the DES-2-optimized extraction of APW polyphenols; Statistics for the evaluation of the model that was developed are provided in the inset tables; Asterisks and colored values indicate statistically significant values.

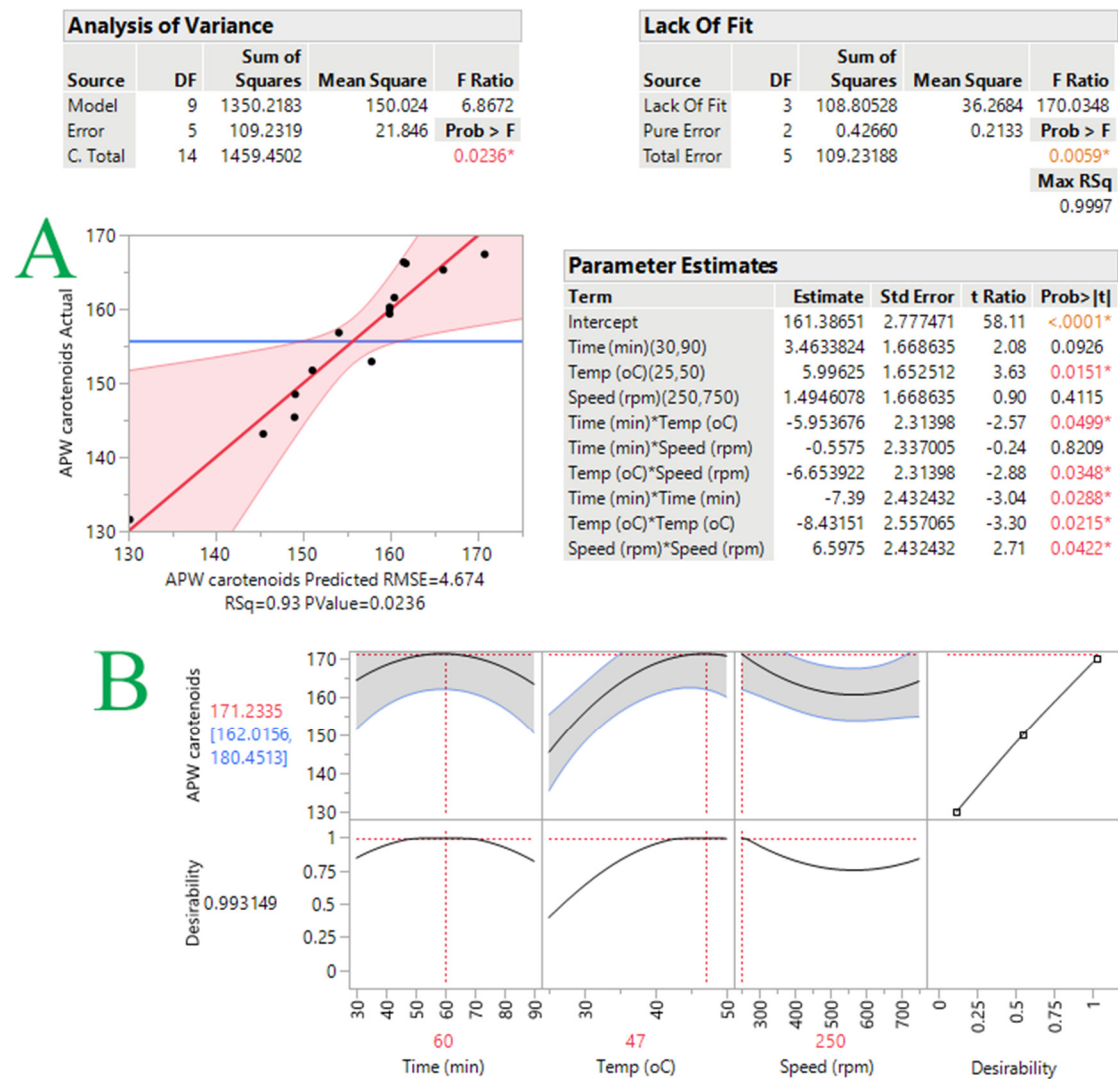

**Figure S2.** Plot comparing actual *vs* predicted values for the response (TCC, mg  $\beta$ -carotene/100 g dw) (plot A) and desirability function (plot B) for the *n*-hexane:acetone:ethanol (2:1:1)-optimized extraction of APW carotenoids; Statistics for the evaluation of the model that was developed are provided in the inset tables; Asterisks and colored values indicate statistically significant values.
